# Supplementary material for: Transcriptional and post-transcriptional control of adipocyte differentiation by Jumonji domain-containing protein 6
Source: PubMed Central journal article supplement — Nucleic Acids Res. 2015 Jun 27;43(16):7790–804. doi: 10.1093/nar/gkv645 (PMC4652747; doi:10.1093/nar/gkv645), 2015-06-27
Supplement: supp_gkv645_nar-00449-v-2015-File003.pdf [file supp_gkv645_nar-00449-v-2015-File003.pdf]

Figure S1

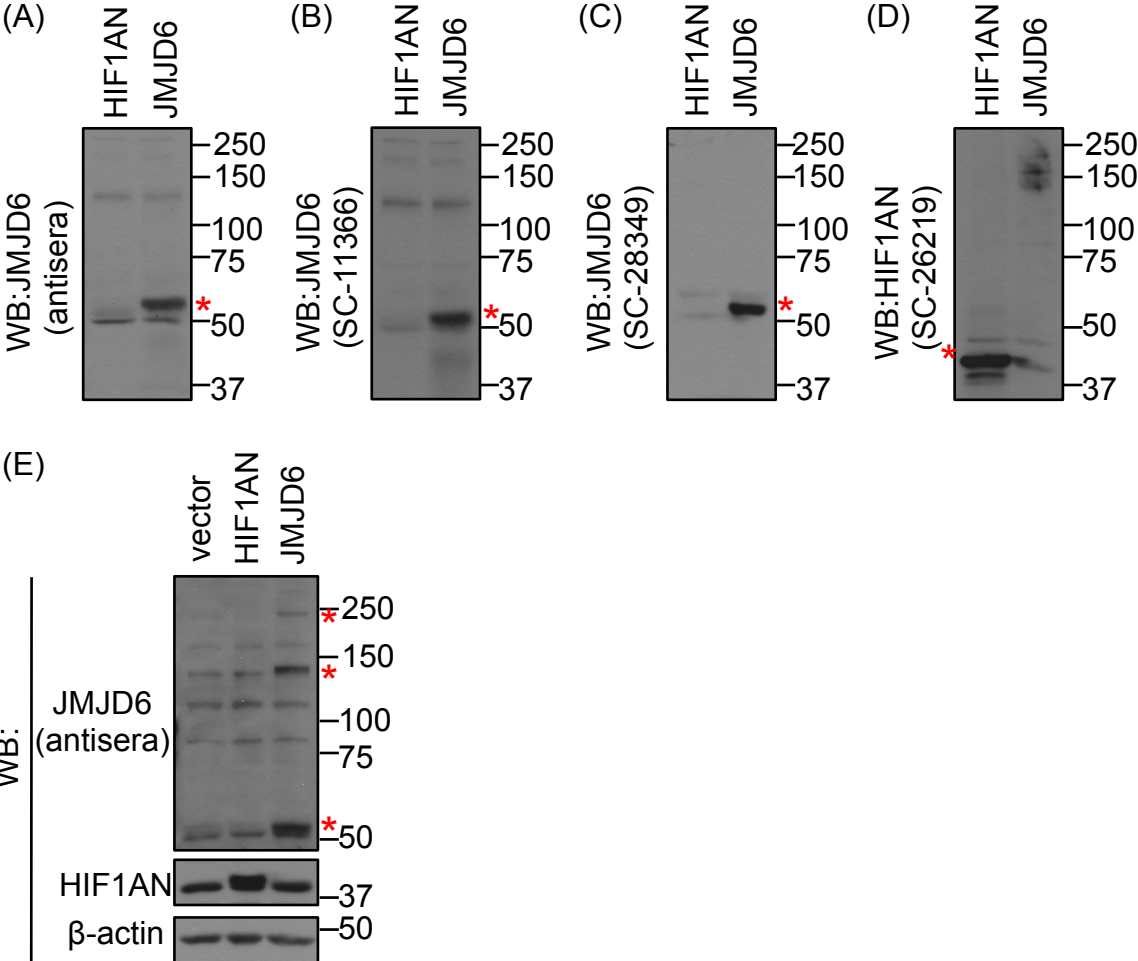

Figure S2

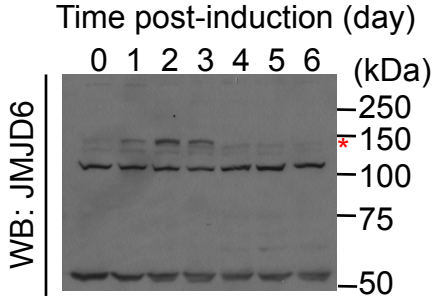

Figure S3

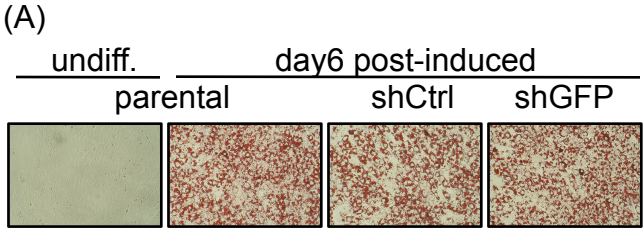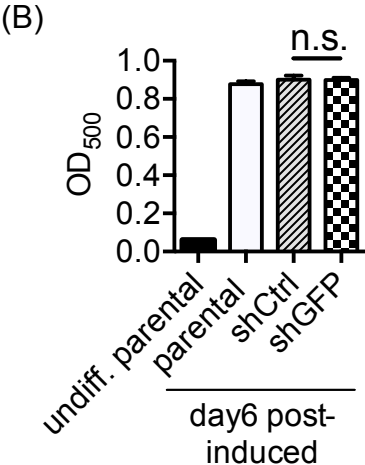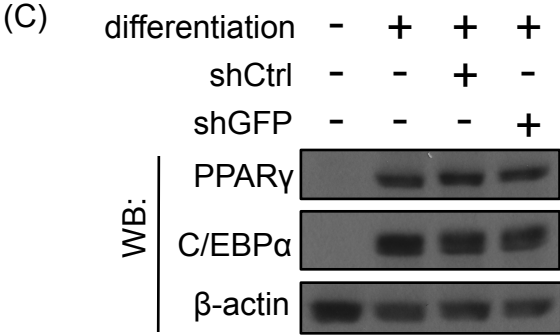

Figure S4

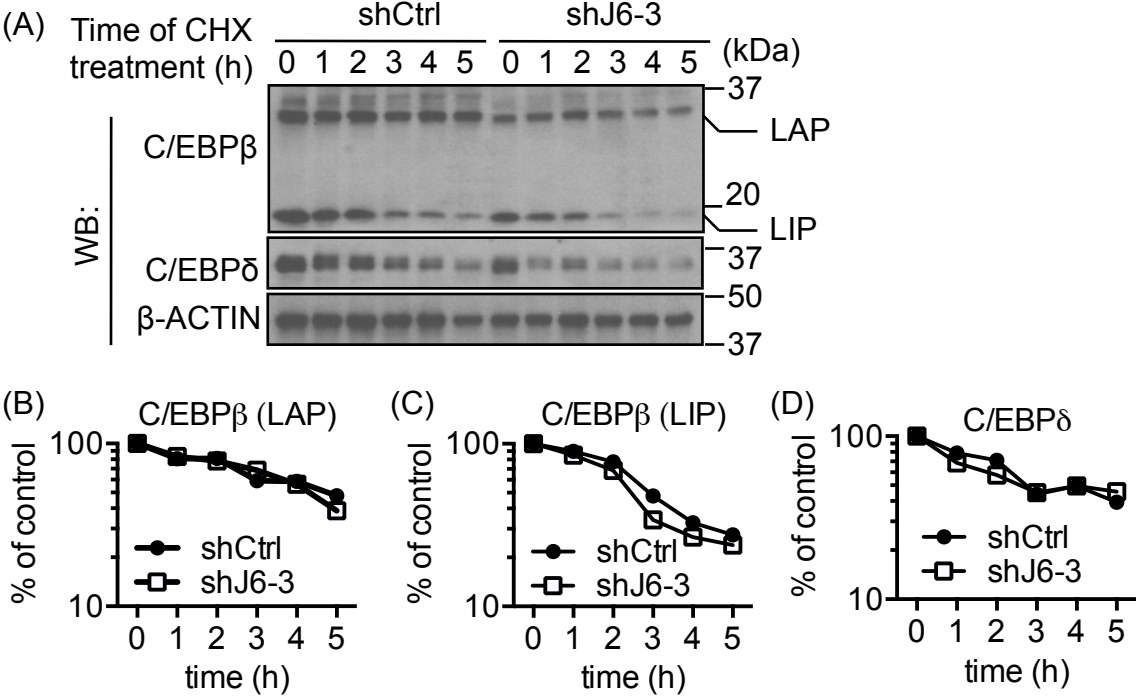

Figure S5

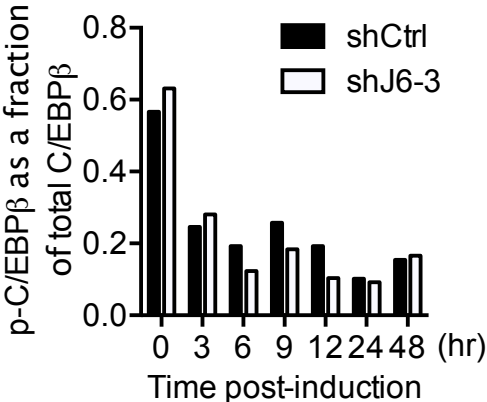

Figure S6

(A)

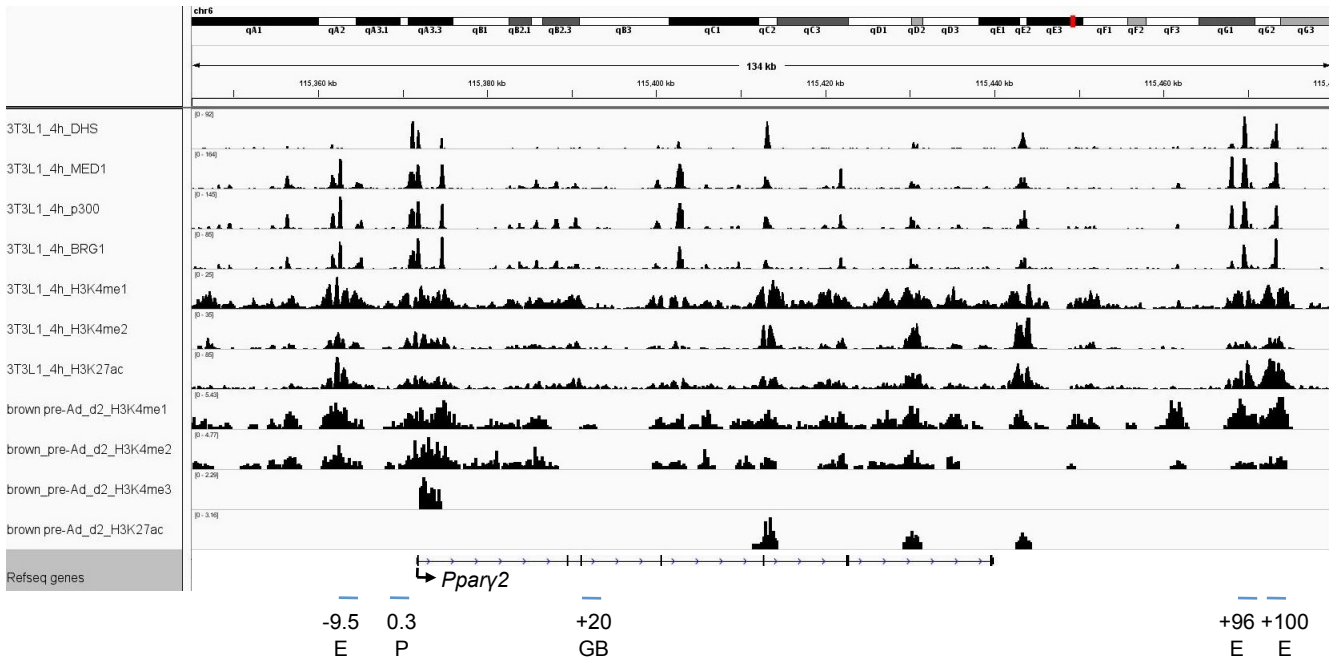

(B)

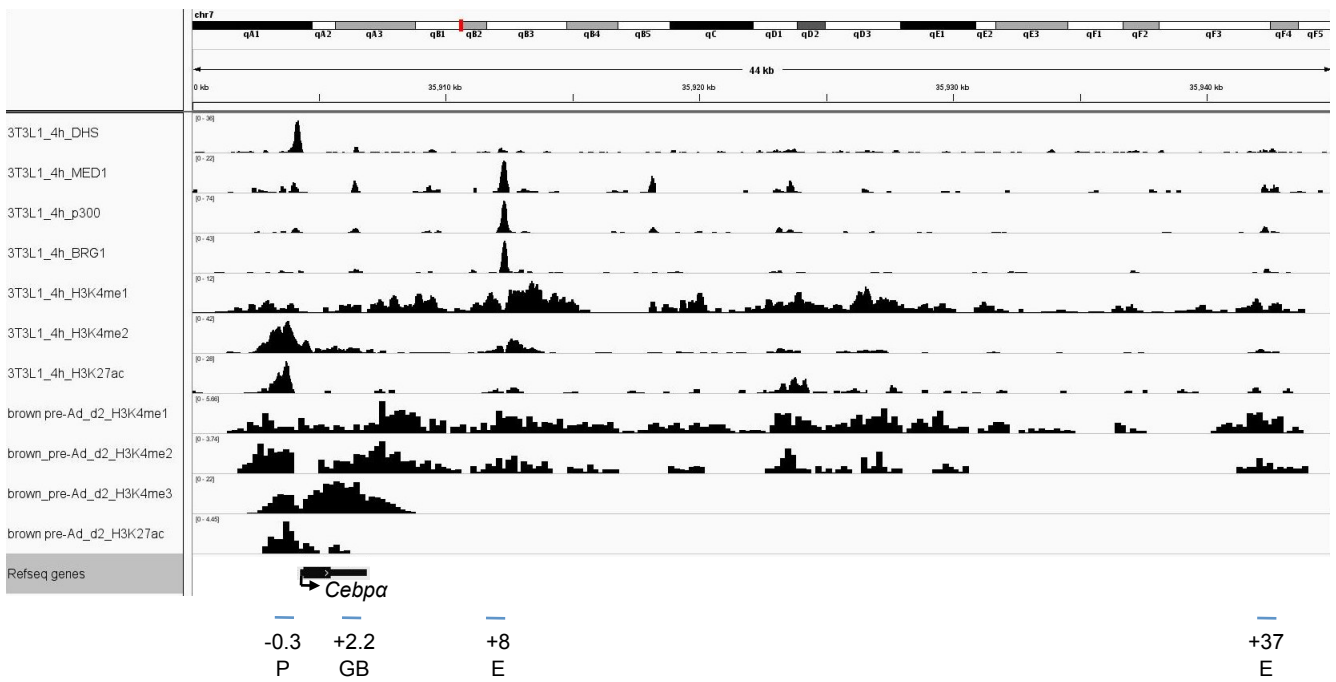

Figure S7

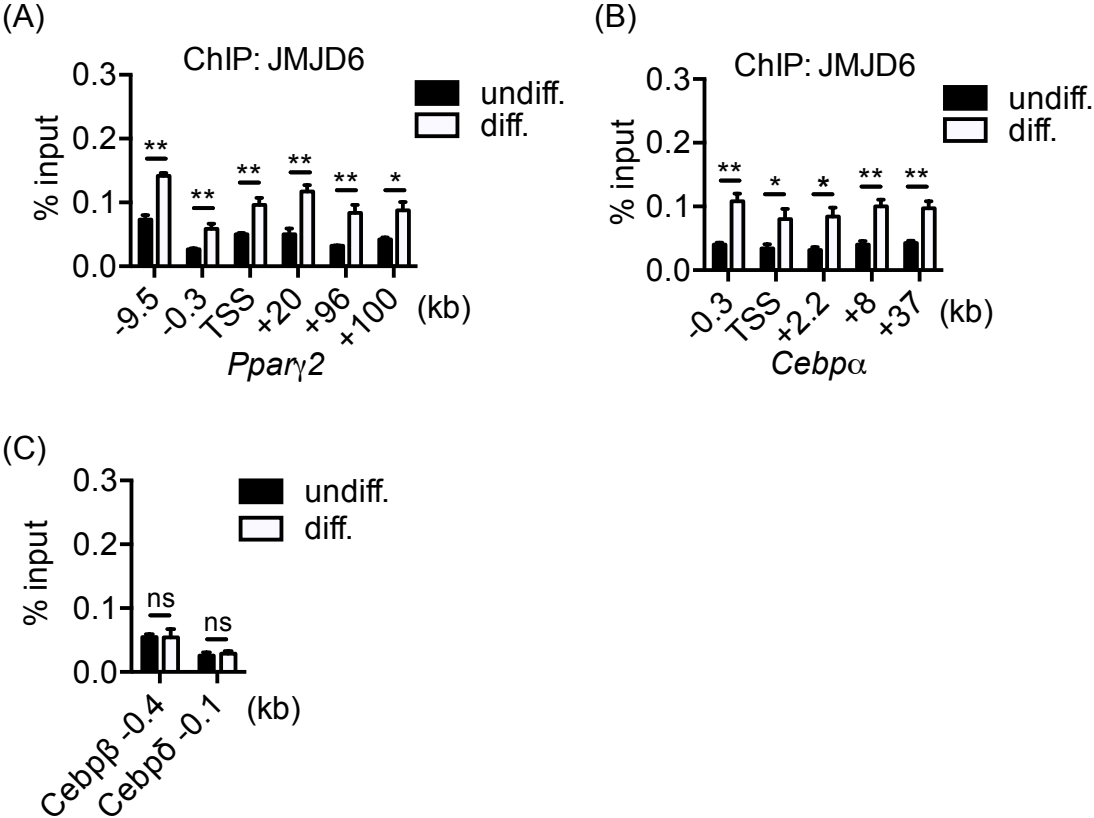

Figure S8

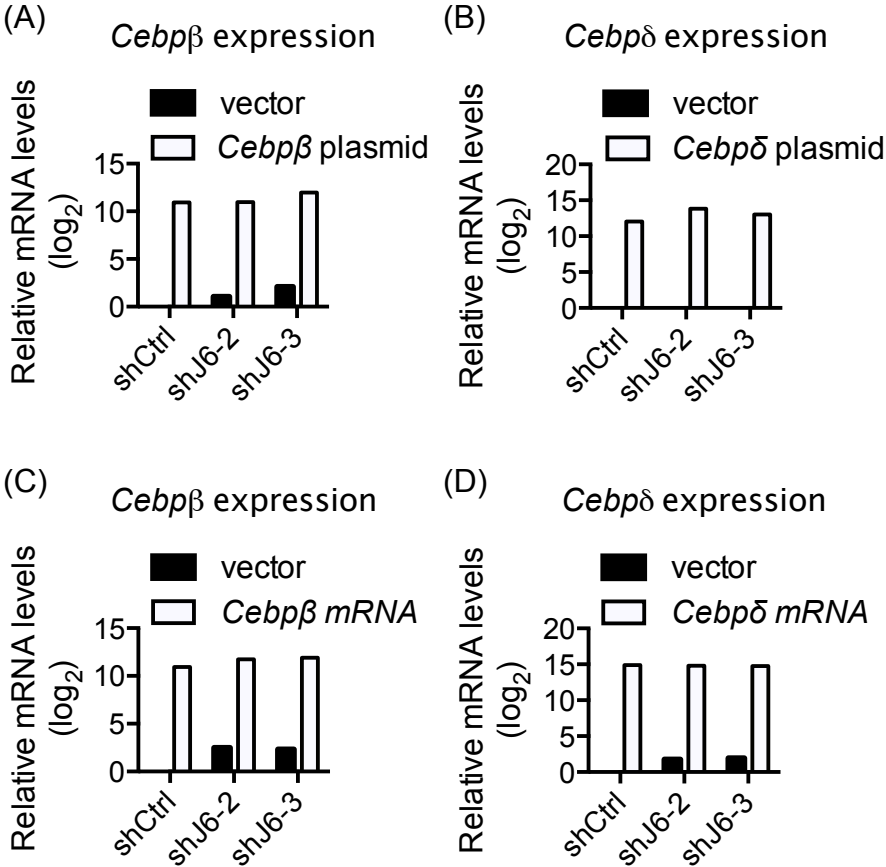



Figure S9

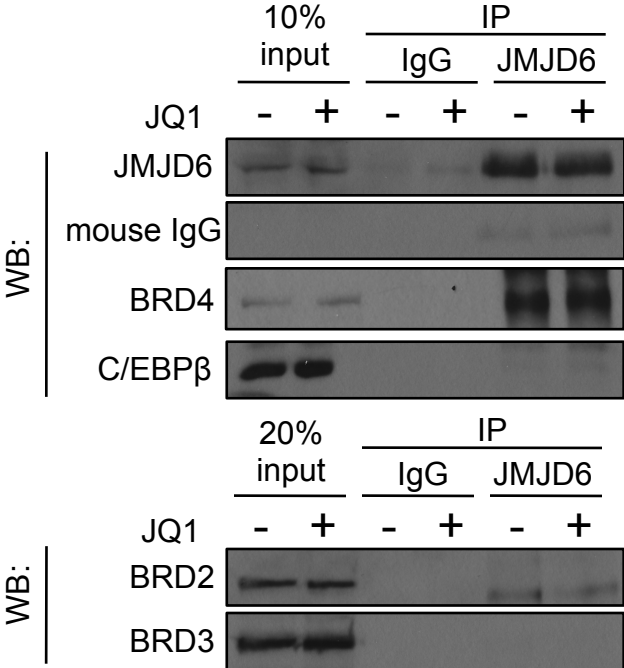

Figure S10

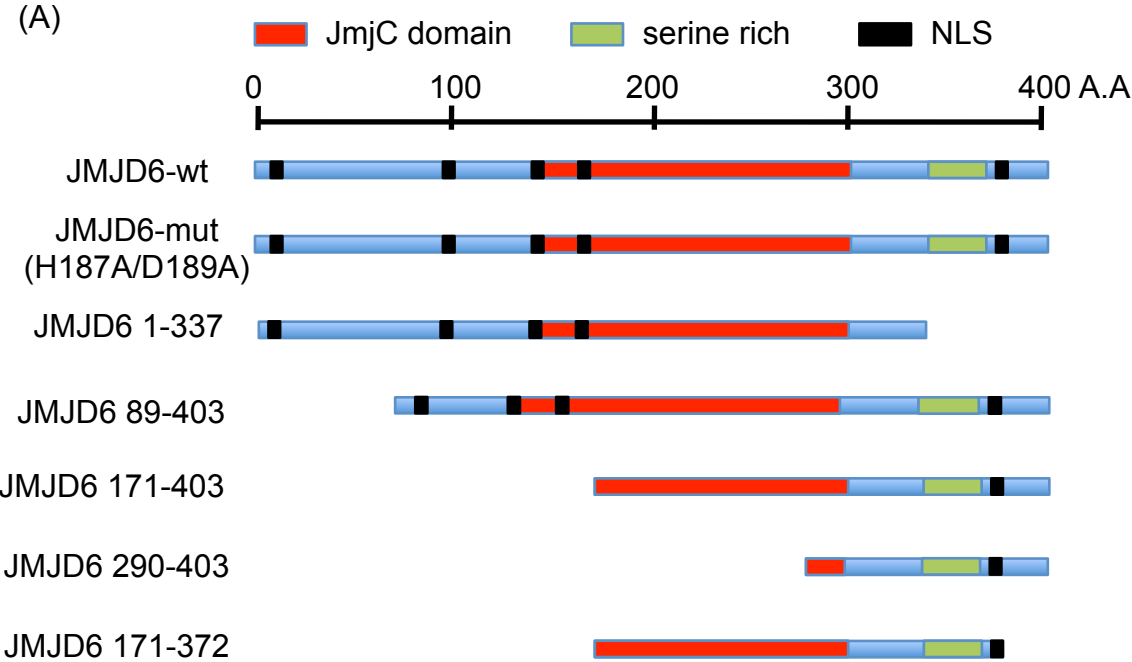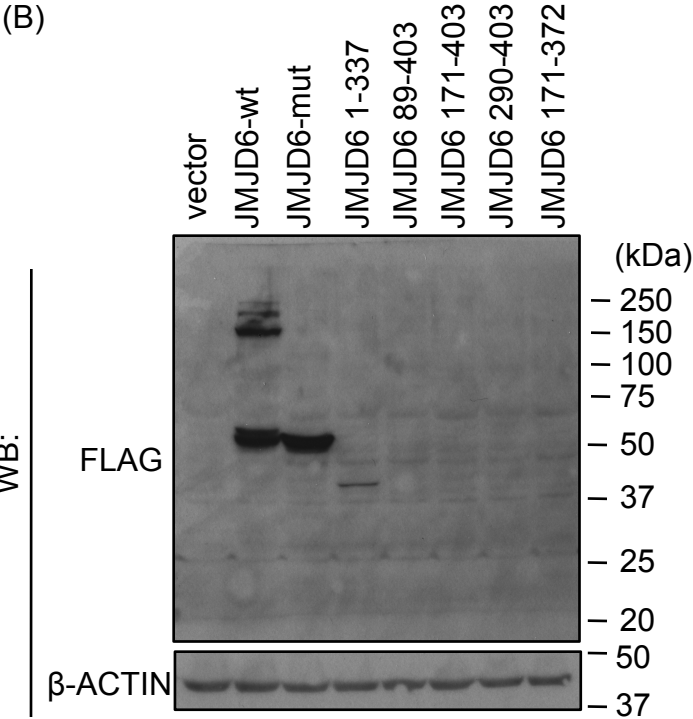

**Table S1. The oligonucleotides and primers for plasmid construction**

| Primer name                    | Sequence 5' to 3'                                                                 |
|--------------------------------|-----------------------------------------------------------------------------------|
| shCtrl forward                 | GATCCTGGCGGCGAGTGAAGTACGTGATAAGTGTGCTG<br>TCCTTATCACGTACTTCACTCGCCGCCATTTTTGGAAA  |
| shCtrl reverse                 | AGCTTTTCCAAAAATGGCGGCGAGTGAAGTACGTGATA<br>AGGACAGCACACTTATCACGTACTTCACTCGCCGCCAGG |
| shGFP forward                  | GATCCCGAAGCAGCACGACTTCTTCGTGTGCTGTCCGA<br>AGTCGTGCTGCTTCTTTTTGGAAA                |
| shGFP reverse                  | AGCTTTTCCAAAAAGAAGCAGCACGACTTCTTCGGACA<br>GCACACGAAGAAGTCGTGCTGCTTCGG             |
| shJ6-2 forward                 | GATCCCCGATGAACCACAAGAGCAAGTGTGCTGTCCTT<br>GCTCTTGTGGTTCATCGTTTTTGGAAA             |
| shJ6-2 reverse                 | AGCTTTTCCAAAAACGATGAACCACAAGAGCAAGGAC<br>AGCACACTTGCTCTTGTGGTTCATCGGG             |
| shJ6-3 forward                 | GATCCCGCTGACACCCAGAGAACAAGTGTGCTGTCCTT<br>GTTCTCTGGGTGTCAGCTTTTTTGGAAA            |
| shJ6-3 reverse                 | AGCTTTTCCAAAAAGCTGACACCCAGAGAACAAGGAC<br>AGCACACTTGTTCTCTGGGTGTCAGCGG             |
| pBABE-JMJD6<br>forward         | CCCGGATCCCTCACGATGAACCACAAGAGCAAG                                                 |
| pBABE-JMJD6<br>reverse         | CGGTGCACTTATCATTGTGCATCGTCGTCCTTGTAGTCC<br>CTGGAGGAGCTGCGCTC                      |
| pcDNA3.1-JMJD6<br>forward      | same as pBABE-JMJD6                                                               |
| pcDNA3.1-JMJD6<br>reverse      | CGAAGCTTTTATCATTGTGCATCGTCGTCCTTGTAGTCC<br>CTGGAGGAGCTGCGCTC                      |
| pcDNA3.1-HIF1AN<br>forward     | CCCGAATTCGTAGAGATGGCGGCGACGGCAGCC                                                 |
| pcDNA3.1-HIF1AN<br>reverse     | CGAAGCTTTTATTATTGTGCATCGTCGTCCTTGTAGTCG<br>TTGTAACGGCCTTTAAT                      |
| JMJD6<br>H187AD189A<br>forward | GCGTTCTGGAAGTGGGATTGCCATCGCCCCTCTGGGG                                             |
| JMJD6<br>H187AD189A<br>reverse | CCCCAGAGGGGCGATGGCAATCCCAGTTCAGAACGC                                              |
| GST-JMJD6 2-414<br>forward     | GCGGATCCAACCACAAGAGCAAGAAGCGCATC                                                  |
| GST-JMJD6 2-414<br>reverse     | CCAAGCTTTTATTGTGCATCGTCGTCCTTGTAGTCCCT<br>GGAGGAGCTGCGCTCTTTGCT                   |

**Table S2. The primers for gene expression analysis**

| Primer name                             | Sequence 5' to 3'       |
|-----------------------------------------|-------------------------|
| <i>Jmjd6</i> forward                    | GAGCGCCTCAAAGGAAATA     |
| <i>Jmjd6</i> reverse                    | TGGGCACCTTGTAGTCTTCC    |
| <i>Ppar<math>\gamma</math>2</i> forward | GCATGGTGCCTTCGCTGATGC   |
| <i>Ppar<math>\gamma</math>2</i> reverse | AGGCCTGTTGTAGAGCTGGGT   |
| <i>Cebp<math>\alpha</math></i> forward  | CCGGCCGCCTTCAACGAC      |
| <i>Cebp<math>\alpha</math></i> reverse  | CTCCTCGCGGGGCTCTTGTTT   |
| <i>Cebp<math>\beta</math></i> forward   | TGGACAAGCTGAGCGACGAG    |
| <i>Cebp<math>\beta</math></i> reverse   | TGTGCTGCGTCTCCAGGTTG    |
| <i>Cebp<math>\delta</math></i> forward  | TTCAGCGCCTACATTGACTC    |
| <i>Cebp<math>\delta</math></i> reverse  | TGTGGTTGCTGTTGAAGAGG    |
| <i>Srebp1c</i> forward                  | AGCTGTCGGGGTAGCGTCTG    |
| <i>Srebp1c</i> reverse                  | GAGAGTTGGCACCTGGGCTG    |
| <i>Fasn</i> forward                     | CGTGTTGGCCTACACCCAGAGCT |
| <i>Fasn</i> reverse                     | GGCAGCAGGGCCTCCAGCACCTT |
| <i>Fabp4</i> forward                    | GCGTGGAATTCGATGAAATCA   |
| <i>Fabp4</i> reverse                    | CCCGCCATCTAGGGTTATGA    |
| <i>AdipoQ</i> forward                   | CAGTGGATCTGACGACACCA    |
| <i>AdipoQ</i> reverse                   | CGAATGGGTACATTGGGAAC    |
| 5S rRNA forward                         | GTCTACGGACATACCACCCTG   |
| 5S rRNA reverse                         | TACAGCACCCGGTATTCCCAG   |

**Table S3. The primers for ChIP assay**

| <b>Name</b>                                    | <b>Sequence 5' to 3'</b> |
|------------------------------------------------|--------------------------|
| <i>Ppar<math>\gamma</math>2</i> -9.5kb forward | TTCTTCCCAGTAGGAACTGCAT   |
| <i>Ppar<math>\gamma</math>2</i> -9.5kb reverse | GATCACTCAGTTGGCATTCTC    |
| <i>Ppar<math>\gamma</math>2</i> -0.3kb forward | TGGCCAAATACGTTTATCTGG    |
| <i>Ppar<math>\gamma</math>2</i> -0.3kb reverse | CCAGTGACCCACACATTCCTG    |
| <i>Ppar<math>\gamma</math>2</i> TSS forward    | ATTCCCACCTCTCCCAAATA     |
| <i>Ppar<math>\gamma</math>2</i> TSS reverse    | GCTCTGGGTCAACAGGAGAA     |
| <i>Ppar<math>\gamma</math>2</i> +20kb forward  | CGAGTCTGTGGGGATAAAGC     |
| <i>Ppar<math>\gamma</math>2</i> +20kb reverse  | CCAAAACAACCTCCCCACAAC    |
| <i>Ppar<math>\gamma</math>2</i> +96kb forward  | CTTGGGAGCTACAGCCTTGTG    |
| <i>Ppar<math>\gamma</math>2</i> +96kb reverse  | GCTGTGGTGAACGACAGTTATTA  |
| <i>Ppar<math>\gamma</math>2</i> +100kb forward | CCGGGCTCCCTAGATGTAGAC    |
| <i>Ppar<math>\gamma</math>2</i> +100kb reverse | ACCCTTCTGAGCGACAACCT     |
| <i>Cebp<math>\alpha</math></i> -0.3kb forward  | CTCCCTAGTGTTGGCTGGAA     |
| <i>Cebp<math>\alpha</math></i> -0.3kb reverse  | GGTGAGTGGGGAGCATAGTG     |
| <i>Cebp<math>\alpha</math></i> TSS forward     | GCCCGACCCTCTATAAAAGC     |
| <i>Cebp<math>\alpha</math></i> TSS reverse     | GGCTCCACCTCGTAGAAGTC     |
| <i>Cebp<math>\alpha</math></i> +2.2kb forward  | GCAGTGTGCACGTCTATGCT     |
| <i>Cebp<math>\alpha</math></i> +2.2kb reverse  | AGCCCACTTCATTTTCATTGG    |
| <i>Cebp<math>\alpha</math></i> +8kb forward    | CACAGTGTCTGCTCGCTGTT     |
| <i>Cebp<math>\alpha</math></i> +8kb reverse    | ATTACAGTGCCGCCAGGTAG     |
| <i>Cebp<math>\alpha</math></i> +37kb forward   | CCCCAATCTTCCCTCAAATGA    |
| <i>Cebp<math>\alpha</math></i> +37kb reverse   | GGAGCCCGGAACCAGAA        |
| <i>Cebp<math>\beta</math></i> -0.4kb forward   | CGTGTAGCTGGAGGAACGAT     |
| <i>Cebp<math>\beta</math></i> -0.4kb reverse   | CTCGGGAACACGGAGGAG       |
| <i>Cebp<math>\delta</math></i> -0.1kb forward  | AGGAGGGAAAGGCAAGGAGT     |
| <i>Cebp<math>\delta</math></i> -0.1kb reverse  | CTTTTCTAGCCCCAGCTGAC     |

## Supplemental Figure and Table Legends

**Figure S1. JMJD6 antisera and antibodies specifically recognize *in vitro* translated and *in vivo* JMJD6 protein.** Representative western blots probed with **(A)** the JMJD6 antisera, **(B and C)** the commercial antibodies for JMJD6, and **(D)** the commercial antibody for HIF1AN, a different JmjC protein. JMJD6 and HIF1AN proteins were *in vitro* translated from 1  $\mu\text{g}$  of the pcDNA3.1(-) plasmids encoding either FLAG-tagged mouse JMJD6 or HIF1AN using a TNT Quick coupled Transcription/Translation Systems (Promega) according to the manufacturer's instructions. 15  $\mu\text{l}$  of the *in vitro* translated mixture was run on 10% SDS-PAGE and Western blotting was performed. **(E)** Representative western blots for JMJD6 and HIF1AN expression in the 24 h post-transfected C3H10T1/2 cells. 2  $\mu\text{g}$  of the pcDNA3.1(-) plasmids encoding either FLAG-tagged mouse JMJD6 or HIF1AN, or the empty vector were transiently transfected into C3H10T1/2 cells using Lipofectamine 2000 according to the manufacturer's instructions. 20  $\mu\text{g}$  of the total cell lysate was run on 10% SDS-PAGE for electrophoresis and Western blotting.  $\beta$ -ACTIN was probed as a loading control. Red asterisks indicate the bands corresponding to the target monomer and oligomeric proteins.

**Figure S2. JMJD6 oligomerization in the C3H10T1/2 cells during adipogenic differentiation.** A representative western blot for JMJD6 levels in undifferentiated (day 0) and in differentiating (day 1 to 6) C3H10T1/2 cells. The oligomeric JMJD6 protein bands (~130kDa) are indicated by the red asterisk.

**Figure S3. Two distinct control shRNAs, shCtrl and shGFP, did not affect the adipogenic differentiation of C3H10T1/2 cells.** (A) Representative Oil Red O staining images, (B) the levels of Oil-Red O staining, and (C) the protein levels of PPAR $\gamma$  and C/EBP $\alpha$  from the cells as indicated.

**Figure S4. JMJD6 knockdown had no effect on C/EBP $\beta$  and C/EBP $\delta$  protein stability.** (A) Representative western blots for C/EBP $\beta$  and C/EBP $\delta$  protein levels upon cycloheximide treatment. The 3 h post-induction cells were treated with 100  $\mu$ g/ml cycloheximide. The total cell lysates were harvested every hour for 5 additional hours in the presence of cycloheximide.  $\beta$ -ACTIN was probed as a loading control. (B-D) C/EBP $\beta$ (LAP), C/EBP $\beta$ (LIP) and C/EBP $\delta$  protein levels in two independent experiments (n=2) were quantified by ImageJ. The protein levels were normalized to  $\beta$ -ACTIN loading control and were presented as the relative expression levels to the 0 h sample (mean, n=2).

**Figure S5. The level of C/EBP $\beta$  phosphorylation is proportional to total C/EBP $\beta$  levels both in the control (shCtrl) and in the JMJD6 knockdown cells (shJ6-3) throughout the early phase of differentiation.** The levels of C/EBP $\beta$  and phosphorylated C/EBP $\beta$  in Figure 4A were quantified by ImageJ.

**Figure S6. Calling the putative enhancers using the published DHS-seq and ChIP-seq datasets.** The DHS-seq datasets (GSE27826) and ChIP-seq datasets (GSE56872 and GSE50466) were uploaded to Integrative Genomics Viewer. (A) Screenshot of *Ppar $\gamma$ 2*

locus. (B) Screenshot of *Cebpa* locus. Blue bars indicate the regions for primer design. P: promoter; E: putative enhancer; GB: gene body.

**Figure S7. Inducible binding of JMJD6 at the *Ppar $\gamma$ 2* and *Cebpa* loci during differentiation.** (A-B) CHIP of JMJD6 at the *Ppar $\gamma$ 2* and *Cebpa* loci in the undifferentiated (0h post-induced) and in the differentiating (24h post-induced) C3H10T1/2 cells. The values are presented as the average % input from three independent experiments (S.E.M, n=3, \* $p$ <0.05, \*\* $p$ <0.01). (C) The binding of JMJD6 at the *Cebp $\beta$*  and *Cebp $\delta$*  promoters was examined as negative controls. The values are presented as the average % input from three independent experiments (S.E.M, n=3, ns: not significant)

**Figure S8. Ectopic expression of *Cebp $\beta$*  and *Cebp $\delta$*  by introduction of plasmid or *in vitro* synthesized RNA.** (A-B) *Cebp $\beta$*  and *Cebp $\delta$*  mRNA levels in the plasmid-transfected cells. The cells were transfected with the plasmids encoding either C/EBP $\beta$  or C/EBP $\delta$  or empty vector for 24 h and then harvested for gene expression analysis. (C-D) *Cebp $\beta$*  and *Cebp $\delta$*  mRNA levels in the RNA-transfected cells. The cells were transfected with the *in vitro* synthesis mRNA encoding either C/EBP $\beta$  or C/EBP $\delta$  for 24 h and harvested for gene expression analysis. The values presented are the average relative expression levels from technical replicates of the matching RNA samples from the western blot experiment presented in Figs. 5A-B.



**Figure S9. BRD4, but not BRD2, BRD3 or C/EBP $\beta$ , is immunoprecipitated with JMJD6 regardless of JQ1 treatment.** Endogenous JMJD6 proteins in day1 post-induced C3H10T1/2 cells with and without JQ1 treatment were immunoprecipitated. The eluted samples were run on 8% SDS-PAGE for western blotting. The blots were probed with antibodies against JMJD6 (sc-28349), mouse IgG (NA9310), BRD4 (A301-985A50), C/EBP $\beta$  (sc-150), BRD2 (A302-583A), and BRD3 (A302-367A).

**Figure S10. Ectopically expression of JMJD6 protein in C3H10T1/2 cells.**

**(A)** Scheme of the full-length wild type, catalytic-inactive and truncated JMJD6 mutants. The DNA sequences encoding the truncated proteins were PCR amplified and cloned into a pBABE vector as the same as for the wild type and catalytic-inactive JMJD6 mutant.

**(B)** A representative western blot for the expression of JMJD6 proteins in C3H10T1/2 cells. The blot was probed with a serum recognizing FLAG sequence and re-probed with an antibody for  $\beta$ -ACTIN as a loading control.

**Table S1. The oligonucleotides for plasmid construction**

**Table S2. The primers for gene expression analysis**

**Table S3. The primers for ChIP assay**
